# Supplementary material for: Lung Cancer Risk and Residential Exposure to Air Pollution: A Korean Population-Based Case-Control Study
Source: PubMed Central journal article supplement — Yonsei Med J. 2017 Sep 28;58(6):1111–8. doi: 10.3349/ymj.2017.58.6.1111 (PMC5653475; doi:10.3349/ymj.2017.58.6.1111), 2017-09-28
Supplement: ymj-58-1111-s001.pdf [file ymj-58-1111-s001.pdf]

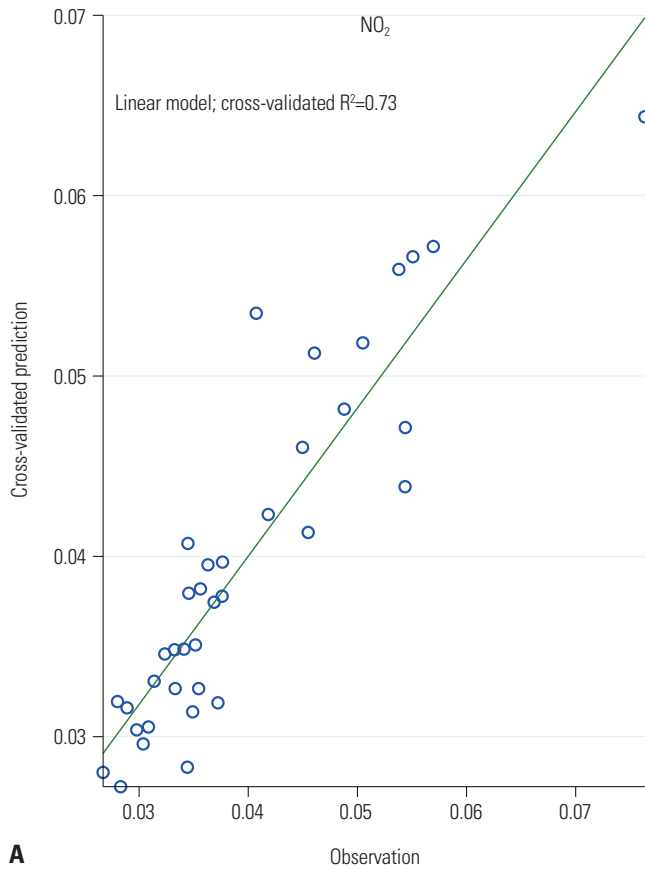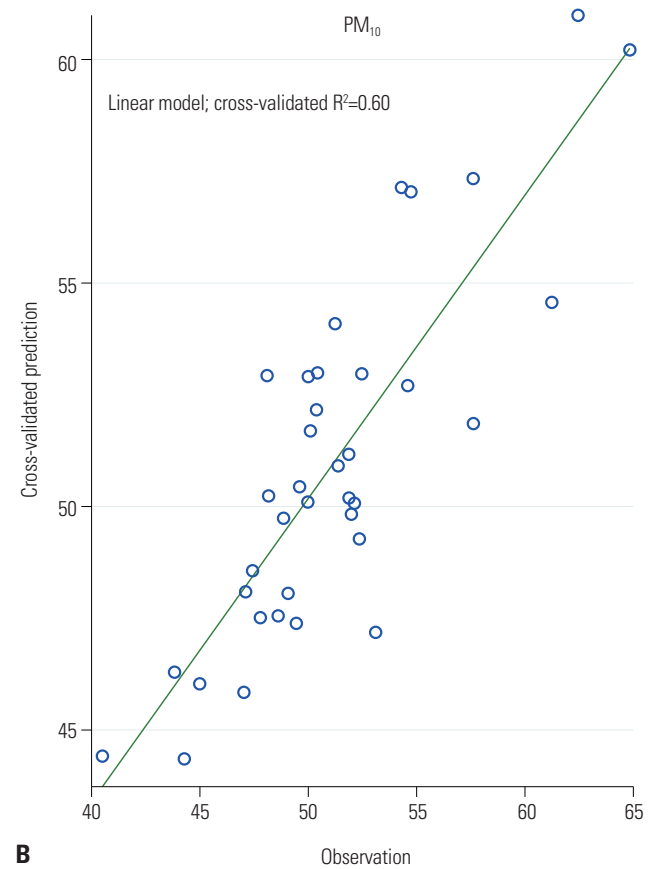

**A** **B**

**Supplementary Fig. 1.** Scatter plots of observations and cross-validated predictions from the land-use regression models for annual concentration of (A) NO<sub>2</sub> and (B) PM<sub>10</sub> in Seoul.
