# Supplementary material for: Lung Cancer Risk and Residential Exposure to Air Pollution: A Korean Population-Based Case-Control Study
Source: PubMed Central journal article supplement — Yonsei Med J. 2017 Sep 28;58(6):1111–8. doi: 10.3349/ymj.2017.58.6.1111 (PMC5653475; doi:10.3349/ymj.2017.58.6.1111), 2017-09-28
Supplement: ymj-58-1111-s002.pdf [file ymj-58-1111-s002.pdf]

**Supplementary Table 1.** ORs for the Association between Lung Cancer Incidence and PM<sub>10</sub> and NO<sub>2</sub> Exposure

| Pollutant                                  | Case/control (n) | OR (95% CI)                 | p value <sup>‡</sup> |
|--------------------------------------------|------------------|-----------------------------|----------------------|
|                                            |                  | Adjusted model OR* (95% CI) |                      |
| <b>PM<sub>10</sub></b>                     |                  |                             |                      |
| All (per 10 µg/m <sup>3</sup> )            | 822/764          | 1.12 (0.98–1.29)            |                      |
| Quartile 1 (<49.7)                         | 207/190          | Reference                   |                      |
| Quartile 2 (49.7–55.9)                     | 200/196          | 0.99 (0.74–1.32)            |                      |
| Quartile 3 (55.9–61.9)                     | 199/198          | 0.97 (0.73–1.30)            |                      |
| Quartile 4 (>61.9)                         | 216/180          | 1.24 (0.92–1.66)            | 0.544                |
| 5-year average <sup>§</sup>                | 822/764          | 0.95 (0.80–1.14)            |                      |
| 10-year average <sup>  </sup>              | 822/764          | 1.19 (1.07–1.33)            |                      |
| 15-year average <sup>¶</sup>               | 822/764          | 1.16 (1.03–1.30)            |                      |
| <b>Histology (per 10 µg/m<sup>3</sup>)</b> |                  |                             |                      |
| Adenocarcinoma                             | 522/764          | 1.08 (0.92–1.25)            |                      |
| Squamous cell carcinoma                    | 181/764          | 1.25 (1.03–1.51)            |                      |
| Small cell <sup>†</sup>                    | 51/764           | 1.39 (1.02–1.91)            |                      |
| Large cell <sup>†</sup>                    | 30/764           | 1.13 (0.76–1.68)            |                      |
| <b>NO<sub>2</sub></b>                      |                  |                             |                      |
| All (per 10 ppb)                           | 822/764          | 1.14 (1.03–1.27)            |                      |
| Quartile 1 (<15.4)                         | 199/198          | Reference                   |                      |
| Quartile 2 (15.4–22.4)                     | 199/197          | 1.03 (0.76–1.38)            |                      |
| Quartile 3 (22.4–30.5)                     | 196/201          | 1.05 (0.78–1.41)            |                      |
| Quartile 4 (>30.5)                         | 228/168          | 1.51 (1.11–2.04)            | 0.056                |
| 5-year average <sup>§</sup>                | 822/764          | 1.09 (0.99–1.21)            |                      |
| 10-year average <sup>  </sup>              | 822/764          | 1.19 (1.07–1.32)            |                      |
| 15-year average <sup>¶</sup>               | 822/764          | 1.15 (1.04–1.28)            |                      |
| <b>Histology (per 10 ppb)</b>              |                  |                             |                      |
| Adenocarcinoma                             | 522/764          | 1.13 (1.00–1.27)            |                      |
| Squamous cell carcinoma                    | 181/764          | 1.12 (0.94–1.34)            |                      |
| Small cell <sup>†</sup>                    | 51/764           | 1.38 (1.07–1.80)            |                      |
| Large cell <sup>†</sup>                    | 30/764           | 0.94 (0.64–1.38)            |                      |

OR, odds ratio; CI, confidence interval; SHS, secondhand smoke.

\*Unless otherwise indicated, all models were adjusted for age, sex, smoking, exposure to SHS at home and work, education, exposure to occupational carcinogens, and frequency of fruit intake otherwise indicated, <sup>†</sup>Adjusted for age, sex, smoking, education, exposure to occupational carcinogens, and frequency of fruit intake, <sup>‡</sup>Test for trend, <sup>§</sup>The average concentration of pollutants was calculated for the period 2010–2014, <sup>||</sup>The average concentration of pollutants was calculated for the period 1995–2004, <sup>¶</sup>The average concentration of pollutants was calculated for the period 1995–2009. All models are single pollutant.
